## RESEARCH ARTICLE

# Potassium fractions in black soil mediated by integrated nutrient management modules under maize-chickpea cropping sequence

C. K. Dotaniya<sup>1</sup>, B. L. Lakaria<sup>2\*</sup>, Yogesh Sharma<sup>1</sup>, B. P. Meena<sup>2</sup>, R. H. Wanjari<sup>2</sup>, A. O. Shirale<sup>2</sup>, M. L. Dotaniya<sup>3\*</sup>, Satish B. Aher<sup>4</sup>, Priya Gurav<sup>2</sup>, Pramod Jha<sup>2</sup>, A. K. Biswas<sup>2</sup>, S. R. Yadav<sup>1</sup>, Kuldeep Kumar<sup>5</sup>, R. K. Douthaniya<sup>6</sup>, M. L. Reager<sup>1</sup>, Manju Lata<sup>7</sup>, R. C. Sanwal<sup>1</sup>

**1** Department of Soil Science & Agricultural Chemistry, College of Agriculture, Bikaner, India, **2** ICAR- Indian Institute of Soil Science, Bhopal, India, **3** ICAR-Directorate of Rapeseed -Mustard Research, Bharatpur, India, **4** ICMR- National Institute for Research in Environmental Health, Bhopal, India, **5** ICAR-Indian Institute of Soil & Water Conservation, RC Kota, India, **6** Department of Agronomy, SKN College of Agriculture, Jobner, India, **7** University of Rajasthan, Jaipur, India

\* [mohan30682@gmail.com](mailto:mohan30682@gmail.com) (MLD); [lakaria2001@gmail.com](mailto:lakaria2001@gmail.com) (BLL)

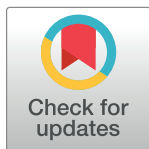

## OPEN ACCESS

**Citation:** Dotaniya CK, Lakaria BL, Sharma Y, Meena BP, Wanjari RH, Shirale AO, et al. (2023) Potassium fractions in black soil mediated by integrated nutrient management modules under maize-chickpea cropping sequence. PLoS ONE 18(9): e0292221. <https://doi.org/10.1371/journal.pone.0292221>

**Editor:** Venkata Ratnam Myneni, MVJ College of Engineering, INDIA

**Received:** June 23, 2023

**Accepted:** September 16, 2023

**Published:** September 29, 2023

**Copyright:** © 2023 Dotaniya et al. This is an open access article distributed under the terms of the [Creative Commons Attribution License](https://creativecommons.org/licenses/by/4.0/), which permits unrestricted use, distribution, and reproduction in any medium, provided the original author and source are credited.

**Data Availability Statement:** All data generated or analysed during this study are included in this MS; publishing agency should have right to use for public domain.

**Funding:** The author(s) received no specific funding for this work.

**Competing interests:** The authors have declared that no competing interests exist.

## Abstract

A field experiment was conducted at the Research Farm of the ICAR-Indian Institute of Soil Science, Bhopal (India) to study influence of different integrated nutrient management (INM) modules on soil potassium (K) fractions. The experiment comprised with twelve treatments laid out in randomized block design (RBD) with three replications under maize-chickpea cropping sequence. The treatments included general recommended dose (GRD), soil test crop response (STCR) dose; combinations of inorganic and organic inputs and only organic modules. The soil samples were collected at crop harvest and analyzed for various K fractions viz., water soluble-K, available-K, exchangeable-K, HNO<sub>3</sub>-K, lattice-K and total-K. The results indicated that potassium fractions were significantly ( $p = 0.05$ ) affected by different treatments. Different INM modules significantly enhanced significantly K availability in soil. Among various INM modules studied, treatment 11 (application of 20 t ha<sup>-1</sup> FYM in maize with 5 t ha<sup>-1</sup> FYM every year in chickpea) proved most beneficial for improving the soil K fractions. Findings of this type are important for K fertilizer management during crop production in areas with low soil fertility.

## Introduction

The growing global population has compelled us to increase food production, despite our limited natural resources. In this context, developing countries like India, which is projected to have a population of 1.66 billion by 2050, will require approximately 333 million tonnes (mt) of food grain. Unfortunately, the quality and availability of these natural resources are on the declined [1]. Additionally, it has been observed that the increasing threat of insect pests, the incidence of diseases, poor nutrient levels, and limited availability of irrigation water are all exacerbated by the changing scenario of climate change, leading to a reduction in crop

productivity. Soil health parameters are also diminishing, which has a significant impact on the potential yield of crops. Diminishing soil fertility stands out as a primary contributor directly impacting crop yields. The use of fertilizers plays a pivotal role in safeguarding soil fertility and bolstering productivity. In India's arable regions, soil fertility often deteriorates due to the substantial nutrient requirements of crops and imprecise fertilizer application. Consequently, effective soil fertility management is imperative to guarantee productivity, nutritional security, and the long-term health and sustainability of the soil [2]. Specifically, inadequate utilization of potassium fertilizers emerges as a significant contributor to declining soil fertility and reduced crop productivity across various regions of India. Potassium (K) is a major constituent of the earth crust. On average, 2.6% of the Earth crust is made of K, making it the seventh most abundant element and fourth most abundant mineral nutrient in the lithosphere [3]. In soil, K exists in four different forms *viz.*, soil solution-K, exchangeable-K, non-exchangeable-K and mineral-K. Soil K mainly exists as constituent of mineral structure and in fixed or non-exchangeable forms with minor portion as water soluble and exchangeable-K [1]. These forms of K are correlated with each other and a dynamic equilibrium exists among them [4]. Due to its activation of numerous enzymes, its role in maintaining water balance in plants is crucial for plant metabolism and development. It also contributes to protein synthesis, photosynthesis, fruit quality, disease and insect pest prevention, as well as cold and frost resilience. Depletion in the soil solution K is likely to shift the equilibrium in the direction to replenish it. The equilibrium reactions affect the level of soluble K at any time, and accordingly the amount of K available for plants [5].

The knowledge about different forms and availability of K is must while studying the response of crops to K because K supply to crop plants is a complex phenomenon involving relationships among various K fractions in soil. Plants utilize not only readily available K but also, at times, non-exchangeable and mineral potassium during crop growth. Potassium is released in soluble and exchangeable forms during the weathering of potassium-bearing minerals, and this release can occur at widely varying rates. Soil solution K is most mobile and prone to leaching in soils. Exchangeable and solution K are often considered as forms readily available to plant, while non-exchangeable and mineral K are slowly available forms [6]. Solution and exchangeable K are replenished by non-exchangeable K when the former are depleted by plant removal or leaching [7]. Potassium fertility status in Indian agricultural soils are categorized accordingly: 21%, 51%, and 28% as low, medium and high, respectively. About 72% of India's agricultural area, representing 266 districts, needs immediate K fertilization [8].

Minimizing the need for K during crop production using organic inputs poses a significant challenge for farmers aiming to meet their organic sourcing requirements. The availability of farmyard manure (FYM) has been steadily declining over time. Another issue arises from organic sources containing lower quantities of essential plant nutrients, necessitating the application of larger volumes of organic materials to meet recommended fertilizer doses for crops. However, the addition of inorganic fertilizers over an extended period to fulfill the requirements of a specific nutrient also carries the risk of disrupting the balance of other plant nutrients in the soil. Furthermore, this practice can have adverse effects on the microbial population and disrupt the various cycles of plant nutrient availability in the soil. A promising solution involves the application of both organic and inorganic sources of potassium in maize and chickpea crop cultivation, which has been shown to improve the soil's overall plant nutrient status. Integrated nutrient management (INM) improves soil fertility status of soil and enhance crop yield. INM improve the soil microbial population and diversity and mediate the plant nutrient dynamics in soil [9, 10]. Potassium in soil behaves in somewhat elusive manner in the sense that while the total K content in most soils is quite high, its availability is largely influenced by a number of soil and plant related factors.

In the above facts, a hypothesis was formulated to monitor the K different forms in INM under maize-chickpea sequence as dominated in this region. This study will be helped to apply the judicious application of organic and inorganic source of plant nutrients during the crop cultivation.

## Materials and methods

### Experiment site

A field experiment was conducted at the research farm of the ICAR-Indian Institute of Soil Science (ICAR-IISS), Bhopal, India. Geographically, the ICAR-IISS lies between 23° 18' N latitude and 77° 24' E longitudes. The elevation above mean sea level is 485 m. The climate of study site is sub-humid and in characterized by cool and dry winters, hot summer and humid monsoon with a mean annual rainfall of 1146 mm 75–80% of which is received during June to September. The mean potential evapo-transpiration is 1208 mm.

### Experiment details

The on-going research project on “Long-term evaluation of integrated plant nutrient supply modules for sustainable productivity in a Vertisol” was used for this investigation (Table 1). During initial 10 years soybean-wheat cropping system was used and there after it was replaced with maize-chickpea from 2012–13. Maize (Pro-Agro 4212)–Chickpea (JG-315), were grown with 20 and 70 kg ha<sup>-1</sup> seed rate for maize–and chickpea with row to row and plant to plant spacing of 60 cm X 25 cm and 30 cm X 10 cm for maize and chickpea, respectively. Crops were grown as per standard cultural practices. The general recommended dose (GRD) of fertilizer application for these crops was 120-60-30 and 20-60-20 kg N, P<sub>2</sub>O<sub>5</sub> and K<sub>2</sub>O, respectively for maize and chickpea. The plot size of the experiment was 20 X 5 sq meters.

### Experimental soil

The physico-chemical properties experimental soil was analysed as per the method described in Singh *et al.* [11]. The soil of experimental site is classified as Vertisol (*Typic Haplusterts*) with smectite as the dominant clay mineral. Vertisols are churning heavy clay soils with a high

**Table 1. Treatment details in maize-chickpea cropping sequence in a Vertisol of central India.**

| Treatment                  | Maize                                                                       | Chickpea                                |
|----------------------------|-----------------------------------------------------------------------------|-----------------------------------------|
| T <sub>1</sub> (Control)   | No Fertilizer/ Manure                                                       | No Fertilizer/ Manure                   |
| T <sub>2</sub> (GRD)       | 120–60–30                                                                   | 20–60–20                                |
| T <sub>3</sub> (STCR dose) | 135–55–50 (5 t ha <sup>-1</sup> )                                           | 0–0–0 (1.5 t ha <sup>-1</sup> )         |
| T <sub>4</sub>             | 75% NPK of T <sub>3</sub>                                                   | 100% P only                             |
| T <sub>5</sub>             | 75% NPK of T <sub>3</sub> + 5 t ha <sup>-1</sup> FYM                        | 100% P only                             |
| T <sub>6</sub>             | 75% NPK of T <sub>3</sub> + 1 t ha <sup>-1</sup> PM                         | 100% P only                             |
| T <sub>7</sub>             | 75% NPK of T <sub>3</sub> + 5 t ha <sup>-1</sup> UC                         | 100% P only                             |
| T <sub>8</sub>             | 75% NPK of T <sub>3</sub> + MR mulch incorporated                           | 100% P only + MR mulch                  |
| T <sub>9</sub>             | 1 t ha <sup>-1</sup> PM + Gly 2 t ha <sup>-1</sup> + MR mulch incorporated  | 100% P only + MR mulch                  |
| T <sub>10</sub>            | 5 t ha <sup>-1</sup> FYM + Gly 2 t ha <sup>-1</sup> + MR mulch incorporated | 100% P only + MR mulch                  |
| T <sub>11</sub>            | 20 t ha <sup>-1</sup> FYM (every season)                                    | 5 t ha <sup>-1</sup> FYM (every season) |
| T <sub>12</sub>            | 75% NPK of T <sub>3</sub> + 20 t ha <sup>-1</sup> FYM (once in 4 years)     | 100% P only                             |

GRD—General recommended dose (kg ha<sup>-1</sup>), STCR—Soil test crop response dose, MR—Maize residues, FYM—Farm yard manure, PM—Poultry manure, UC—Urban compost, WR- Wheat Residue, Gly—Glyricidia

<https://doi.org/10.1371/journal.pone.0292221.t001>

proportion of swelling clays. These soils form deep wide cracks during summer season. The soil of the experimental site is clayey in texture with 25.2, 18 and 56.8 per cent of sand, silt and clay, respectively. The soil was medium in soil organic carbon (0.53%), low in available N ( $68.8 \text{ mg kg}^{-1}$ ), medium in available P ( $12.8 \text{ mg kg}^{-1}$ ) and high in available K ( $237 \text{ mg kg}^{-1}$ ). The soil was normal in reaction (pH 7.76) and electrical conductivity (EC) was  $0.48 \text{ dS m}^{-1}$ . DTPA extractable micronutrients Fe, Mn, Zn and Cu were measured 5.52, 9.44, 0.74 and  $1.32 \text{ mg kg}^{-1}$ , respectively.

### Soil sampling, processing and determination of soil K fractions

Soil samples were collected from 0–15 cm depth after harvest of *winter* season crop from ten years old ongoing experiments; and were homogenized. Visible litter and roots were picked out from collected soil samples. The soil samples were air-dried at room temperature, ground and sieved through 2 mm sieve. The processed soil was stored in air tight plastic containers for further analysis of different K fractions. Different K fractions in soil sample viz., water soluble-K, available-K, exchangeable-K,  $\text{HNO}_3$ -K, lattice-K and total-K were determined following standard methods. The water-soluble K was determined in 1:2.5 soil: water extract by shaking soil-water suspension for half an hour [12]. The soil available K was extracted from the soil using neutral normal ammonium acetate in 1:5 soil solution ratio and the K in extract was recorded using flame photometer [13]. The soil Exchangeable-K fraction was calculated as the difference between available K and water soluble K. The  $\text{HNO}_3$ -K was determined by boiling nitric acid extraction method as outlined by Wood and Deturk [14]. The total- K content was determined by digesting the soil samples with hydrofluoric acid (HF) in a closed vessel [15]. The lattice-K was calculated by deducting  $\text{HNO}_3$ -K from total K.

### Statistical analysis

The experiment comprised with twelve treatments laid out in a randomized block design (RBD) with three replications under maize-chickpea cropping sequence. All the measurements are the mean value of three separate replicates. Data was subjected to an analysis of variance. The mean values were grouped for comparisons and the least significant differences (LSD) among them were calculated at  $p < 0.05$  confidence level using ANNOVA statistics as outlined by Gomez and Gomez [16].

## Results and discussion

### Soil K fraction under different INM modules

The data pertaining to the water soluble K, available K, exchangeable K,  $\text{HNO}_3$ -K, lattice K and total K influenced by long term integrated nutrient management in 0–15 cm soil depth during 2012–13, 2013–14 and pooled of 2 years are presented in Tables 2 and 3 and Fig 1, respectively. In the year 2012–13 soil sample analysis value showed that INM module treatment 11 was obtained higher total K (1.142%), whereas 1.159% in the year 2013–14. This treatment having more amount of K fraction like water soluble, available K, exchangeable K, lattice K etc. Statistical analysis showed that most of the K fractions were significantly affected by INM module except lattice K and total K. The soil K fractions were observed in following order irrespective of treatments: total-K > Lattice-K >  $\text{HNO}_3$ -K > Exchangeable-K > Available-K > Water soluble-K. In this experiment, different forms of K was affected by the application of INM modules under maize-chickpea cropping sequence. The water soluble K under various long- term INM modules ranged  $3.71$ – $8.08 \text{ mg kg}^{-1}$  in 2012–13 and  $4.48$ – $6.08 \text{ mg kg}^{-1}$  in the year 2013–14. The lowest concentration of water soluble K in present investigation might be attributed to the fact that the K in the soil solution is more easily utilized by the crop [17]. Sawarkar et al. [18]

Table 2. Effect of various INM treatments on soil K fractions in the year 2012–13.

| Treatment       | Water soluble-K        | Available-K            | Exchangeable-K         | HNO <sub>3</sub> -K    | Lattice -K | Total-K |
|-----------------|------------------------|------------------------|------------------------|------------------------|------------|---------|
|                 | (mg kg <sup>-1</sup> ) | (mg kg <sup>-1</sup> ) | (mg kg <sup>-1</sup> ) | (mg kg <sup>-1</sup> ) | (%)        | (%)     |
| T <sub>1</sub>  | 3.71                   | 207.5                  | 203.8                  | 513.7                  | 1.039      | 1.090   |
| T <sub>2</sub>  | 4.09                   | 214.4                  | 210.3                  | 631.7                  | 1.060      | 1.123   |
| T <sub>3</sub>  | 4.66                   | 228.3                  | 223.7                  | 682.7                  | 1.072      | 1.141   |
| T <sub>4</sub>  | 4.09                   | 217.8                  | 213.7                  | 633.3                  | 1.070      | 1.133   |
| T <sub>5</sub>  | 6.25                   | 246.1                  | 239.8                  | 635.3                  | 1.056      | 1.120   |
| T <sub>6</sub>  | 4.79                   | 224.5                  | 219.7                  | 542.3                  | 1.051      | 1.105   |
| T <sub>7</sub>  | 4.98                   | 225.7                  | 220.7                  | 551.0                  | 1.050      | 1.105   |
| T <sub>8</sub>  | 4.93                   | 244.8                  | 239.8                  | 548.3                  | 1.052      | 1.107   |
| T <sub>9</sub>  | 4.97                   | 241.5                  | 236.5                  | 532.3                  | 1.054      | 1.107   |
| T <sub>10</sub> | 4.80                   | 238.6                  | 233.8                  | 633.3                  | 1.067      | 1.130   |
| T <sub>11</sub> | 8.08                   | 281.3                  | 273.2                  | 623.0                  | 1.079      | 1.142   |
| T <sub>12</sub> | 4.75                   | 225.3                  | 220.5                  | 617.0                  | 1.069      | 1.131   |
| SEm ±           | 0.34                   | 6.81                   | 6.83                   | 19.90                  | 0.048      | 0.049   |
| Lsd (p = 0.05)  | 1.00                   | 19.99                  | 20.03                  | 58.36                  | NS         | NS      |

<https://doi.org/10.1371/journal.pone.0292221.t002>

discussed the contributions of various potassium (K) fractions in soil, ranking them as follows: lattice-K > non-exchangeable-K > exchangeable-K > water-soluble-K. A similar trend in the abundance of K fractions in soils was also observed by Soremi et al. [19]. In a recent study, Jadhao et al. [20] reported the sequential dominance of K fractions in Vertisols of Akola as follows: lattice K > non-exchangeable K > exchangeable K > available K > water-soluble K. Earlier, Prakash and Singh [21] found the water-soluble K fraction to range from 8 to 50 mg kg<sup>-1</sup> with a mean value of 18.25 for surface soil and 16.45 mg kg<sup>-1</sup> for sub-surface soil.

### Water soluble K

The water soluble K under various long- term INM modules ranged 3.71 to 8.08 mg kg<sup>-1</sup> in 2012–13 and 4.48 to 6.08 mg kg<sup>-1</sup> in 2013–14. Water soluble K fraction was 3.71 in control plot

Table 3. Effect of various INM treatments on soil K fractions in the year 2013–14.

| Treatment       | Water soluble-K        | Available-K            | Exchangeable-K         | HNO <sub>3</sub> -K    | Lattice -K | Total-K |
|-----------------|------------------------|------------------------|------------------------|------------------------|------------|---------|
|                 | (mg kg <sup>-1</sup> ) | (mg kg <sup>-1</sup> ) | (mg kg <sup>-1</sup> ) | (mg kg <sup>-1</sup> ) | (%)        | (%)     |
| T <sub>1</sub>  | 4.48                   | 202.5                  | 198.0                  | 565.0                  | 1.044      | 1.100   |
| T <sub>2</sub>  | 4.94                   | 217.2                  | 214.3                  | 626.9                  | 1.081      | 1.144   |
| T <sub>3</sub>  | 4.91                   | 219.5                  | 212.3                  | 667.5                  | 1.083      | 1.150   |
| T <sub>4</sub>  | 5.19                   | 211.9                  | 207.0                  | 649.9                  | 1.078      | 1.143   |
| T <sub>5</sub>  | 6.00                   | 243.8                  | 237.8                  | 715.8                  | 1.078      | 1.150   |
| T <sub>6</sub>  | 4.53                   | 215.5                  | 211.0                  | 586.7                  | 1.076      | 1.135   |
| T <sub>7</sub>  | 5.38                   | 219.9                  | 214.5                  | 661.1                  | 1.071      | 1.137   |
| T <sub>8</sub>  | 5.41                   | 233.4                  | 228.0                  | 667.8                  | 1.070      | 1.137   |
| T <sub>9</sub>  | 4.97                   | 220.0                  | 215.0                  | 613.4                  | 1.071      | 1.132   |
| T <sub>10</sub> | 5.24                   | 234.2                  | 229.0                  | 640.0                  | 1.079      | 1.143   |
| T <sub>11</sub> | 6.08                   | 271.8                  | 265.7                  | 751.9                  | 1.084      | 1.159   |
| T <sub>12</sub> | 5.28                   | 226.8                  | 221.5                  | 695.3                  | 1.054      | 1.123   |
| SEm ±           | 0.30                   | 7.24                   | 9.52                   | 25.99                  | 0.047      | 0.046   |
| Lsd (p = 0.05)  | 0.88                   | 21.24                  | 27.91                  | 76.24                  | NS         | NS      |

<https://doi.org/10.1371/journal.pone.0292221.t003>

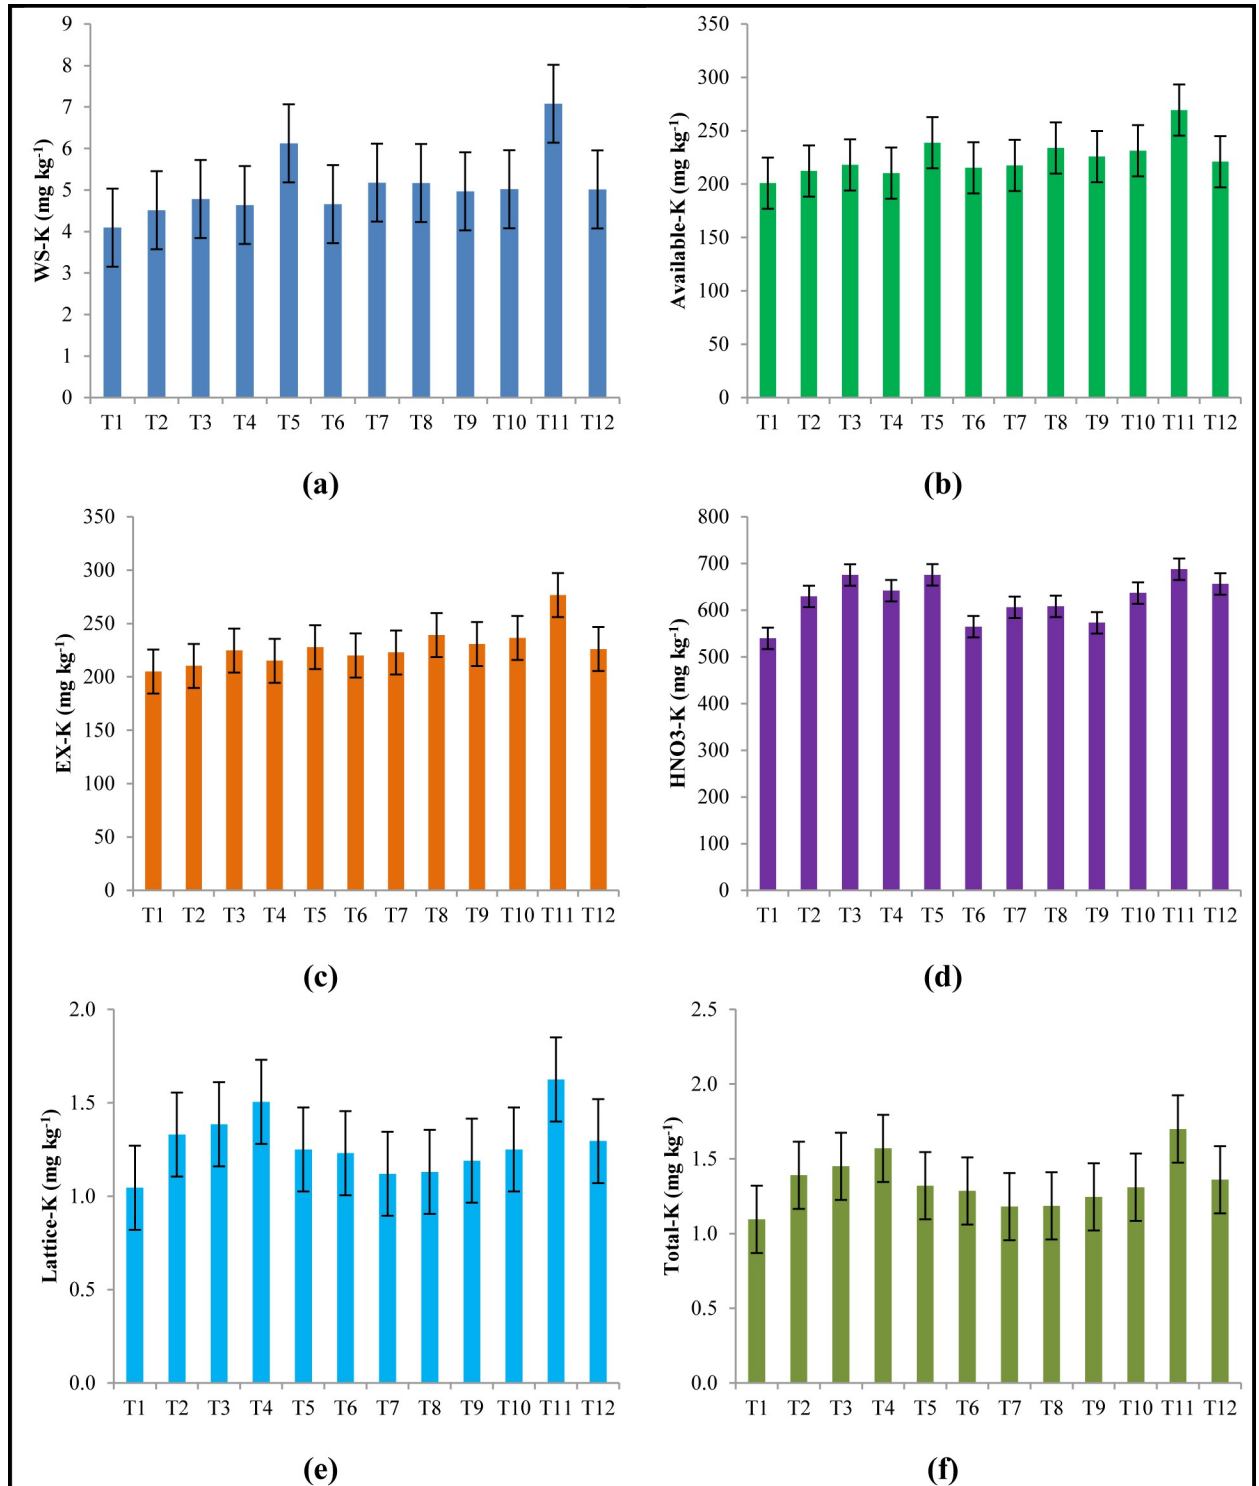

**Fig 1.** Effect of various INM modules on soil K fractions (a-Water soluble-K; b-Soil available-K; c-Exchangeable-K; d-HNO<sub>3</sub>-K; e-Lattice-K; f-Total-K; Error bars indicate critical difference at 5% level of significance; data is pooled of two years).

<https://doi.org/10.1371/journal.pone.0292221.g001>

and highest K level ( $8.08 \text{ mg kg}^{-1}$ ) in treatment 2012–13 under treatment 11 of INM module (Table 3). Similarly, the average water soluble K across the treatments under study was found  $5.10 \text{ mg kg}^{-1}$ . Similarly, Dhillon *et al.* [22] observed that the water-soluble K fraction constituted approximately 0.06% of the total K in some benchmark soil profiles of Punjab and Himachal Pradesh. In the surface soil (0–15 cm), the water-soluble K was found to be highest and statistically significant under the treatment receiving FYM at  $20 \text{ t ha}^{-1}$  for maize, followed by FYM at  $5 \text{ t ha}^{-1}$  (T11), in comparison to all the other treatments under study. Sharma and Verma [23] noted that the water-soluble K fraction increased by up to 45% when lantana was added as a source of K over time in acid Alfisols of Palampur. Pannu *et al.* [24] reported that incorporation of organic materials to the soil improved the water soluble K fraction over unamended control under long-term application of organic materials on different K fractions in an Alfisol under rice-wheat cropping system. Similarly, Majumdar *et al.* [25] also observed that water soluble-K increased significantly with increasing doses of K and addition of FYM. The results of water soluble K in surface soil are in conformity with the earlier findings of Sharma *et al.* [23], Mercykutty *et al.* [26], Sharma and Bhandari [27], Gurusurthy and Prakash [28], Jatav and Dewangan [29] and Sharma and Paliyal [30].

### Available K

The soil available K under various long-term INM modules ranged  $207.5\text{--}281.3 \text{ mg kg}^{-1}$ . Similarly, the average soil available K across the treatments under study was found  $224.6 \text{ mg kg}^{-1}$  (Fig 1). Although available K is represent only a small fraction of total K. Similarly, the treatment receiving FYM @  $20 \text{ t ha}^{-1}$  to maize followed by FYM @  $5 \text{ t ha}^{-1}$  (T<sub>11</sub>) showed highest soil available K and found statistically significant over rest all the treatments under study. The treatment with 100% STCR dose and/or with integration of organic manures showed significant with respect to the soil available K content. The balance application of K through the organic and inorganic sources of plant nutrients were contributing in most of the fractions during the study. Singh and Kuhad [31] was found as high as 0.61% of total K in different bio-climatic zones of Haryana. Prasad and Rajamannar [32] reported that K fertilizer application showed marked rise in available K in soils having slow and moderate K releasing capacity and these soils showed a decrease in available K with increasing crop maturity. Upadhyay and Bhandari [33] observed the available-K status ( $261.0 \text{ kg ha}^{-1}$ ) of the soil increased with increase in fertilizer compared with control ( $177.4 \text{ kg ha}^{-1}$ ) in an experiment in gravelly loam Typic Hapludalf of Solan. Further, Arora and Chahal [34] also reported available K content varied from  $41.5$  to  $314.0 \text{ mg kg}^{-1}$  in the surface and  $32.0$  to  $243.0 \text{ mg kg}^{-1}$  in the subsurface soils with an average value of  $76.0 \text{ mg kg}^{-1}$ . Similarly, Sharma and Bhandari [27] also reported available K content varied from  $1.12$  to  $3.33 \text{ me } 100 \text{ g}^{-1}$  in the apple growing red soil. Majumdar *et al.* [25] reported increase in available K with increasing doses of K and FYM in a Hapludalf under rice-wheat cropping system. Similarly, Sawarkar *et al.* [18] also documented highest available-K under 100% NPK+FYM ( $295.2 \text{ kg ha}^{-1}$ ), followed by 150% NPK ( $284.2 \text{ kg ha}^{-1}$ ). The increase in available K upon the integrated application has already been reported by Kas *et al.* [35], Srinivasa Rao and Srinivas [36] and Meena *et al.* [37]. Incorporation of organic materials to the soil improved the available K fraction over unamended control and available K might be due to addition of K to available pool of the soil and mobilization of the native or non-exchangeable forms of K and charge the soil solution with K ions, resulting increase in the K availability in soil [24, 38].

### Exchangeable K

The exchangeable-K of a soil is difficult to define theoretically and to determine experimentally due to the absence of a sharp distinction between soluble and exchangeable fractions; and the

existence of difficultly exchangeable K in some soils that is not immediately extracted by usual reagents. The exchangeable K concentration in soil was measured 203.8 mg kg<sup>-1</sup> in the control plot and highest (273.2 mg kg<sup>-1</sup>) in the treatment 11 under INM module in the year 2012–13 (Table 2). Whereas, exchangeable K fraction was lower down in the year 2013–14 from 198.0 in control and 265.7 mg kg<sup>-1</sup> treatment 11 of INM module, respectively. The exchangeable K under various long-term INM modules ranged 198.0–273.2 mg kg<sup>-1</sup> in both the years. Similarly the average exchangeable K across the treatments under study was found 227.8 mg kg<sup>-1</sup>. Srivastava Rao *et al.* [39] reported 0.19 to 0.39 cmol kg<sup>-1</sup> exchangeable K in the surface soil (0–15 cm) in vertisol with highest values was obtained in 100% NPK+FYM treatments. The treatment involving integrated nutrient management and/or recommended dose balanced fertilizers showed positive influence on exchangeable K and these treatments were found statistically significant over other treatments under study. Similarly, Jadhao *et al.* [20] also reported that the application of 100% NPK + FYM @ 5 t ha<sup>-1</sup> significantly increased the exchangeable K 201 mg kg<sup>-1</sup> in 0–15 cm depth soil. In practice, the determined exchangeable-K value is almost certain to be affected by one or more of these factors [40]. Exchangeable-K is the portion of the soil K that is electrostatically bound as an outer-sphere complex to the surfaces of clay minerals and humic substances. It is readily exchanged with other cations, also is readily available to soil, and plants [41]. The exchange adsorption of Ca and Mg relative to that of K and sodium is increased upon dilution of the system with water. Thus, neutral soil having soluble Ca and K, the dilution will result in an increase in exchangeable calcium and an equivalent decrease in exchangeable-K. Although there is no sharp distinction between exchangeable and water-soluble K for practical purposes the exchangeable-K is considered to be adsorbed on soil clay complexes and is replaced with neutral salt solutions like ammonium acetate in a relatively short time.

### HNO<sub>3</sub>-K, lattice K and total K

The soil HNO<sub>3</sub>-K under various long-term INM modules ranged 513.7 to 682.7 mg kg<sup>-1</sup> in the year 2012–13; whereas 565–751.9 mg kg<sup>-1</sup> in the year 2013–14. Similarly, the average soil HNO<sub>3</sub>-K across the treatments under study was found 624.4 mg kg<sup>-1</sup>. The treatment receiving FYM @ 20 t ha<sup>-1</sup> to maize followed by FYM @ 5 t ha<sup>-1</sup> to chickpea (T<sub>11</sub>) showed highest soil HNO<sub>3</sub>-K and found statistically significant over rest all the treatments under study except in 2012–13 (Fig 1). The treatment receiving STCR dose (T<sub>3</sub>) found next superior treatment with respect to the soil HNO<sub>3</sub>-K. The value of lattice K under various long-term INM modules ranged 1.039 to 1.079% in the year 2012–13 and 1.044 to 1.084% in the year 2013–14; and the average lattice K across the treatments was found 1.28%. The lattice K found non significantly ( $p = 0.05$ ) higher under the treatment receiving FYM @ 20 t ha<sup>-1</sup> to maize followed by FYM @ 5 t ha<sup>-1</sup> to chickpea (T<sub>11</sub>) over rest all the treatments under study (Fig 1). In this, experiment, total K content was non significantly affected by the different treatments. However, in both the years, total K was observed more under treatment T<sub>11</sub> over rest of the treatments (Tables 2 & 3). Kori *et al.* [42] reported 1.334% as the average value of lattice-K in vertisol. Jadhao *et al.* [20] reported that the application of 100% NPK + FYM @ 5 t ha<sup>-1</sup> significantly increased the lattice K (17078 mg kg<sup>-1</sup>) in 0–15 cm depth in Vertisol of central India. Ranganathan and Satyanarayana [43] reported that lattice K content followed a decreasing order in red, alluvium, laterite and black soils. The results of present investigation are in line with these findings. Total K refers to the sum of all the forms of K present in the soil. The total K content of the soil varied depending on the presence or absence of K bearing minerals and addition sources of K supply. The presence of minerals like feldspars (orthoclase and microcline), mica and illite enhances the total K in soil. Though the total K content provides an idea of the

quantity of K present, it does not indicate anything about the quantity of K assessable for plant growth. In present investigation the total K under various long term INM modules ranged 1.10–1.70% and across the treatments it was found 1.34%. Dixit et al. [44] observed that this particular fraction varied from 185.48 to 2104.84 mg kg<sup>-1</sup> in ten soil series in western Uttar Pradesh. In a study by Jadhao et al. [20], it was recorded that the application of 100% NPK + FYM at a rate of 5 tons per hectare significantly increased the non-exchangeable potassium content, reaching 945 mg kg<sup>-1</sup> in the surface layer of Vertisols in Akola, Maharashtra. Gurumurthy and Prakasha [28] reported that the total potassium content in surface soils ranged from 0.77 to 1.59 percent. This form of potassium contributed the most to the total potassium content compared to other fractions, primarily because it includes potassium from potassium-bearing minerals. The treatment receiving FYM @ 20 t ha<sup>-1</sup> to maize followed by FYM @ 5 t ha<sup>-1</sup> to chickpea (T<sub>11</sub>) showed highest total K and found statistically significant over rest all the treatments under study. The treatment receiving STCR dose (T<sub>3</sub>) also found superior over other treatments (Tables 2 & 3). Dixit et al. [43] reported that the application of P and K decreased the total K content compared to the control group. This reduction was attributed to higher yields and increased nutrient uptake resulting from intensive cropping in a long-term fertilizer experiment conducted in Jabalpur, Madhya Pradesh. When a 100 percent optimal nitrogen dose was applied alone, it decreased the total K content even more than the control. This decrease was due to the development of residual acidity caused by the application of urea, which resulted in the release of non-exchangeable K into the soil solution. In contrast, Majumdar et al. [25] observed that the total K content remained almost unchanged despite the application of K fertilizer. It was also observed that addition of inorganic fertilizer and organic sources were minimized the K status in the Czech Republic soils [45].

## Conclusions

Potassium is an essential plant nutrient that plays a crucial role in determining crop yield and seed quality. Unfortunately, many farmers tend to overlook the importance of potassium application during crop production. It has been observed that most Indian soils have lower levels of potassium in the soil solution, which can limit crop yields. Integrated nutrient management (INM) offers a viable solution for maintaining soil fertility and enhancing crop yields. In this experiment, various INM modules were assessed to evaluate their impact on different potassium fractions in the soil. The results indicated that application of FYM at a rate of 20 tons per hectare per year in maize and 5 t ha<sup>-1</sup> FYM (every years) in chickpea (T<sub>11</sub>) showed highest availability of K fractions in both the years. However, the treatment T<sub>5</sub> (75% NPK of T<sub>3</sub> + 5 t ha<sup>-1</sup> FYM in maize and 100% P in chickpea) also significant improved the K fractions in soil. These approaches not only improved soil potassium fractions but also enhanced soil potassium availability. These findings are valuable for managing potassium in most soils, especially in maize-chickpea cropping sequences.

## Acknowledgments

Authors are grateful to Director, ICAR-IISS for providing necessary facilities for research work. We are also thankful to technical staff of ICAR-IISS, Bhopal for valuable help during course of work. First author thankful to UGC, New Delhi for providing financial support during course of research work.

## Author Contributions

**Conceptualization:** B. L. Lakaria, B. P. Meena, A. K. Biswas, S. R. Yadav.

**Data curation:** B. L. Lakaria, Yogesh Sharma, A. O. Shirale, M. L. Dotaniya, Satish B. Aher.

**Formal analysis:** C. K. Dotaniya, B. P. Meena, A. O. Shirale, M. L. Dotaniya, Satish B. Aher, Priya Gurav, Pramod Jha, R. K. Douthaniya, M. L. Reager, R. C. Sanwal.

**Funding acquisition:** B. L. Lakaria.

**Investigation:** R. H. Wanjari.

**Methodology:** C. K. Dotaniya, Yogesh Sharma, B. P. Meena, R. H. Wanjari, M. L. Dotaniya, Satish B. Aher, Priya Gurav, Pramod Jha, Kuldeep Kumar, M. L. Reager, R. C. Sanwal.

**Project administration:** C. K. Dotaniya, B. L. Lakaria, Yogesh Sharma, Pramod Jha, A. K. Biswas, S. R. Yadav.

**Resources:** S. R. Yadav, M. L. Reager.

**Software:** B. P. Meena, A. O. Shirale, Satish B. Aher, Kuldeep Kumar, Manju Lata.

**Supervision:** B. L. Lakaria, Yogesh Sharma, R. H. Wanjari.

**Validation:** A. O. Shirale, M. L. Dotaniya.

**Visualization:** A. O. Shirale, M. L. Dotaniya, R. K. Douthaniya.

**Writing – original draft:** C. K. Dotaniya, M. L. Dotaniya, R. K. Douthaniya, M. L. Reager, R. C. Sanwal.

**Writing – review & editing:** M. L. Dotaniya, Kuldeep Kumar, Manju Lata.

## References

1. Dotaniya CK, Lakaria BL, Sharma Y, Meena BP, Shirale AO, Dotaniya ML, et al. (2023) Estimation of potassium by Mehlich-3 extractant under integrated nutrient management. *National Academic Science Letter* <https://doi.org/doi10.1007/s40009-023-01282-3>
2. Prasad R, Power JF (1997) *Soil Fertility Management for Sustainable Agriculture*. CRC Press LLC, Boca Raton, Florida.
3. Schroeder D (1974) Relationship between soil potassium and the potassium nutrition of plants. In: potassium Research and Agriculture Production. International Potash Institute Berne, Switzerland. pp. 53–63.
4. Nagwe K, Kheoruenromne I, Suddhiprakarn A (2012) Potassium status and physicochemical and mineralogical properties of lowland Vertisols in a rice-based cropping system under tropical savanna climate. *Kasetsart Journal—Natural Science* 46: 522–37.
5. Sparks DL (1987) Potassium dynamics in soils. *Advances in Soil Science—Springer* 6: 1–63.
6. Dotaniya CK, Lakaria BL, Singh M, Sharma Y, Meena BP, Dotaniya ML, et al. (2022) Long-term integrated nutrient management on potassium balance and uptake kinetics in maize–chickpea cropping system in a Vertisol. *The Pharma Innovation Journal* 11(1): 1358–1362.
7. Cox AE, Joern BC, Brouder SM, Gao D (1999) Plant available potassium assessment with a modified sodium tetraphenyl boron method. *Soil Science Society of American Journal* 63: 902–911.
8. Hasan R (2002) Potassium status of soils in India. *Better Crops International* 16(2): 1–5.
9. Dotaniya ML, Meena VD, Basak BB, Meena RS (2016) Potassium uptake by crops as well as microorganisms. In: *Potassium solubilizing microorganisms for sustainable agriculture* (Meena VS, Maurya BR, Verma JP, Meena RS, eds). Springer India, pp 267–280. [https://doi.org/10.1007/978-81-322-2776-2\\_19](https://doi.org/10.1007/978-81-322-2776-2_19)
10. Salim MM (2020) Introduction to the integrated nutrient management strategies and their contribution to yield and soil properties. *International Journal of Agronomy* <https://doi.org/10.1155/2020/2821678>.
11. Singh D, Chhonkar PK, Dwivedi BS (2005) *Manual for soil water plant and fertilizer analysis*. Westville Pub, New Delhi India, pp. 117–142.
12. Ussis U (1954) *Diagnosis and improvement of saline and alkali soils*. Washington: United States Department of Agriculture.

13. Hanway JJ, Heidal HS (1952) Soil analysis methods as used in Iowa state college soil testing laboratory. *Iowa State College Agriculture Bulletin* 57: 1–13.33.
14. Wood LH, Deturk EE (1940) The absorption of potassium in soils in non-exchangeable forms. *Proceedings of the Soil Science Society of America* 5: 152–161.
15. Jackson ML (1969) *Soil chemical analysis- Advanced Course*, 2nd Edn. Publ. by the author, University of Wisconsin, Madison, USA.
16. Gomez KA, Gomez A (1983) *Statistical procedures for agricultural research*, 2nd edition. John Wiley and Sons, New York, 1–680.
17. Jat G, Majumdar SP, Jat NK (2014) Effect of potassium and zinc fertilizer on crop yield, nutrient uptake and distribution of potassium and zinc fractions in Typic ustipsamment. *Indian Journal of Agricultural Science* 84(7): 832–838.
18. Sawarkar SD, Khamparia NK, Thakur R, Dewda MS, Singh M (2013) Effect of long-term application of inorganic fertilizers and organic manure on yield, potassium uptake and profile distribution of potassium fractions in Vertisol under soybean-wheat cropping system. *Journal of the Indian Society of Soil Science* 61(2): 94–98.
19. Soremi AO, Adetunji MT, Adejuyigbe CO, Bodunde JG, Azeez JO (2017) Influence of organic manure on phosphorus and potassium fractions in soil planted with soybean. *International Journal of Plant & Soil Science* 14(2): 1–11.
20. Jadhao SD, Dipali A, Mali DV, Singh M, Kharche VK, Wanjari RH, et al. (2018) Effect of long-term manuring and fertilization on depth wise distribution of potassium fractions under sorghum-wheat cropping sequence in vertisol. *Journal of Indian Society of Soil Science* 66(2): 172–181.
21. Prakash C, Singh V (1985) Forms of potassium in alluvial soils of Western Uttar Pradesh. *Journal of the Indian Society of Soil Science* 33(4): 911–914.
22. Dhillon SK, Dhillon KS (1994) Forms of potassium in some benchmark soils of India. The potassium fraction. *Journal of Potassium Research* 10(1): 1–11.
23. Sharma RP, Verma TS (2000) effects of long-term lantana addition on soil potassium fractions, yield and potassium uptake in rice-wheat cropping in acid Alfisols. *Journal of Potassium Research* 16: 41–47.
24. Pannu RPS, Singh Y, Singh V, Khind CS (2002) Long-term effects of organic materials on depth wise distribution of different K fractions in soil profile under Rice-wheat cropping system. *Journal of Potassium Research* 18: 1–5.
25. Majumdar B, Venkatesh MS, Kumar K, Patiram (2002) Effect of levels of potassium and FYM on yield and uptake of nutrients by sweet potato and different forms of K in an acid Alfisol of Meghalaya. *Journal of Potassium Research* 18: 84–89.
26. Mercykutty J, Sudhakumari P, Punnoose KI (2000) Dynamics of potassium in soils as Influenced by Long Term Application of potassium to Rubber. *Journal of Potassium Research* 16: 12–14.
27. Sharma U, Bhandari AR (2003) Potassium distribution in some apple orchards of high hill wet temperate zone of Himachal Pradesh. *Journal of Potassium Research* 19: 29–32.
28. Gurumurthy KT, Prakash HC (2011) Potassium fixation capacity of surface soils under different land use systems. *Journal of Indian Society of Soil Science* 59(2): 185–187.
29. Jatav GK, Dewangan DK (2012) Distribution of various forms of potassium in Inceptisol of Baloda block in Janjgir district of Chhattisgarh. *Journal of Progressive Agriculture* 3(2):175–180.
30. Sharma U, Paliyal SS (2015) Forms of soil potassium as influenced by long term application of chemical fertilizers and organics in rainfed maize-wheat cropping system. *Journal Krishi Vigyan* 3(2): 48–53.
31. Singh R, Kuhad MS (1981) Available and potentially available form of potassium and their relationship with some of the physico-chemical characteristics of soils of Haryana. *Haryana Agricultural University Journal of Research* XI: 75–76.
32. Prasad PR, Rajamannar A (1987) Changes in forms of potassium during cropping in soils of varied K releasing power. *Journal of Potassium Research* 11: 13–23.
33. Upadhyay GP, Bhandari M (1997) Changes in different forms of potassium under fertilizer resource constraints in wheat-maize cropping sequence. *Journal of Potassium Research* 13(3–4): 219–226.
34. Arora S, Chahal DS (2003) Distribution of available potassium in bench mark soils of Punjab in relation to soil characteristics. *Journal of Potassium Research* 19: 41–44.
35. Kas M, Mühlbachová G, Kusá H, Pechová M (2016) Soil phosphorus and potassium availability in long-term field experiments with organic and mineral fertilization. *Plant Soil and Environment* 62(12): 558–565.
36. Srinivasa RC, Srinivas K (2017) Potassium dynamics and role of non-exchangeable potassium in crop nutrition. *Indian Journal of Fertilizers* 13(4): 80–94.

37. Meena VS, Maurya BR, Meena SK, Mishra PK, Bisht JK, Pattanayak A (2018) Potassium solubilization: Strategies to mitigate potassium deficiency in agricultural soils. *Global Journal of Biology, Agriculture & Health Sciences* 7: 3.
38. Srinivasa DK, Chikkaramappa PK, Basavaraja TS, Sukanya K Murali, Chamegowda TC (2019) Status of different forms of potassium under foxtail millet crop as influenced by graded levels of potassium in Alfisols of Chikkaballapura region, Karnataka. *International Journal of Chemical Studies* 7(3): 3435–3441.
39. Srinivasan V, Rubina MR, Hamza S, Ramachandran K (2002) Forms of soil potassium as influenced by organic fertilizers in bush black pepper (*Piper nigrum* L.). *Journal of Potassium Research* 18: 99–104.
40. Reitemeier RF (1951) The chemistry of soil potassium. *Advances in Agronomy* 3: 113–164.
41. Mohamed M, Sirajudeen KNS, Swamy M, Yaacob N, Sulaiman SA (2010) Studies on the antioxidant properties of tualang honey of Malaysia. *African Journal of Traditional, Complementary and Alternative Medicines* 7: 59–63.
42. Kori S, Singh SK, Morya R, Dhakad H, Keshri S, Rajput BK (2018) Status and distribution of different forms of potassium in soils of Ashoknagar district (M.P.). *International Journal of Chemical Studies* 6(4): 2610–2613.
43. Ranganathan A, Satyanarayana T (1980) Studies on potassium status of soils of Karnataka. *Journal of Indian Society of Soil Science* 28: 148–153.
44. Dixit AK, Sachan RS, Srivastava PC, Mishra MK (1993) Distribution of different forms of potassium in some soil series of Western Uttar Pradesh. *Journal of Potassium Research* 9(4): 295–314.
45. Balik J, Cerny J, Kulhanek M, Sedlar O, Suran P (2019) Balance of potassium in two long-term field experiments with different fertilization treatments. *Plant, Soil and Environment* 65:225–232.
